# Supplementary material for: Parental perceptions of children’s exposure to tobacco smoke: development and validation of a new measure
Source: PubMed Central journal article supplement (PMC6102809; doi:10.1186/s12889-018-5928-1), 2018-08-20
Supplement: 12889_2018_5928_MOESM1_ESM.pdf [file 12889_2018_5928_MOESM1_ESM.pdf]

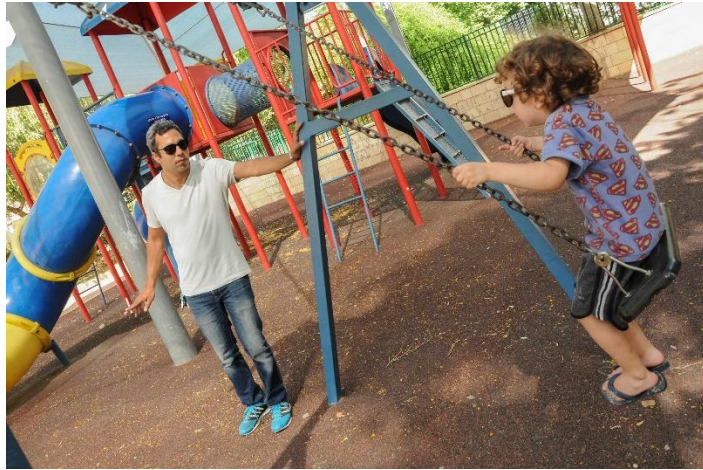

1 2 3 4 5 6 7

not at all  
exposed

highly  
exposed

3.

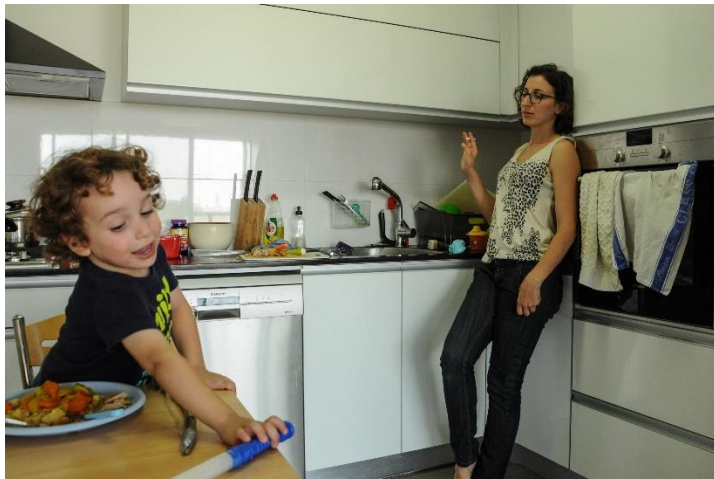

1 2 3 4 5 6 7

not at all  
exposed

highly  
exposed

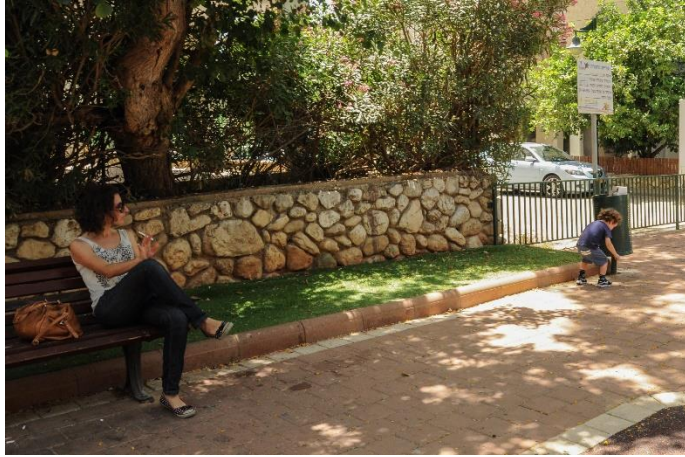

4.

1 2 3 4 5 6 7

not at all  
exposed

highly  
exposed

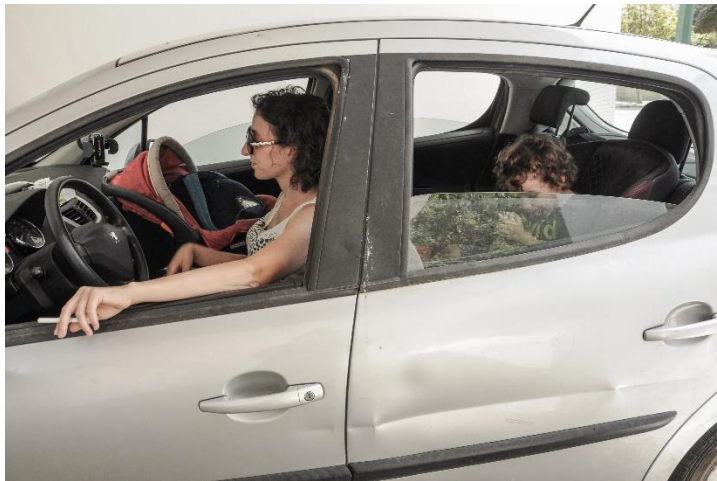

5.

1 2 3 4 5 6 7

not at all  
exposed

highly  
exposed



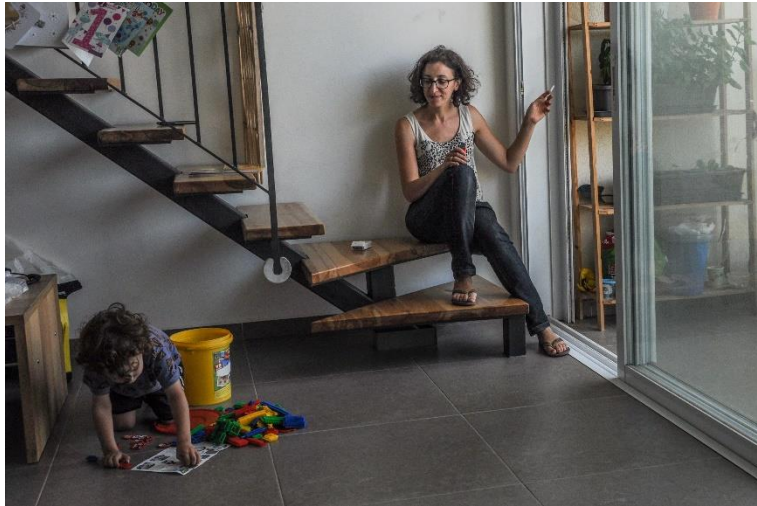

8.

1   2   3   4   5   6   7

not at all exposed                        highly exposed

B. In the following questions situations will be described without pictures. Please rate to what degree you think the child described is exposed to cigarette smoke? (To what degree does the smoke reach him/her?)

9. The child is in the kitchen, someone is smoking on the adjacent service balcony

1   2   3   4   5   6   7

not at all exposed                        highly exposed

10. The child is in a room where someone smoked 12 hours ago

1   2   3   4   5   6   7

not at all exposed                        highly exposed

11. The child is in a room where someone smoked 2 hours ago

|                    |                       |                       |                       |                       |                       |                       |                       |                |
|--------------------|-----------------------|-----------------------|-----------------------|-----------------------|-----------------------|-----------------------|-----------------------|----------------|
|                    | 1                     | 2                     | 3                     | 4                     | 5                     | 6                     | 7                     |                |
| not at all exposed | <input type="radio"/> | <input type="radio"/> | <input type="radio"/> | <input type="radio"/> | <input type="radio"/> | <input type="radio"/> | <input type="radio"/> | highly exposed |

12. The child is in a room where someone smoked 30 minutes ago

|                    |                       |                       |                       |                       |                       |                       |                       |                |
|--------------------|-----------------------|-----------------------|-----------------------|-----------------------|-----------------------|-----------------------|-----------------------|----------------|
|                    | 1                     | 2                     | 3                     | 4                     | 5                     | 6                     | 7                     |                |
| not at all exposed | <input type="radio"/> | <input type="radio"/> | <input type="radio"/> | <input type="radio"/> | <input type="radio"/> | <input type="radio"/> | <input type="radio"/> | highly exposed |

13. The child is in a car where someone smoked 1 hour ago

|                    |                       |                       |                       |                       |                       |                       |                       |                |
|--------------------|-----------------------|-----------------------|-----------------------|-----------------------|-----------------------|-----------------------|-----------------------|----------------|
|                    | 1                     | 2                     | 3                     | 4                     | 5                     | 6                     | 7                     |                |
| not at all exposed | <input type="radio"/> | <input type="radio"/> | <input type="radio"/> | <input type="radio"/> | <input type="radio"/> | <input type="radio"/> | <input type="radio"/> | highly exposed |

14. The child is in a car where someone smoked 20 minutes ago

|                    |                       |                       |                       |                       |                       |                       |                       |                |
|--------------------|-----------------------|-----------------------|-----------------------|-----------------------|-----------------------|-----------------------|-----------------------|----------------|
|                    | 1                     | 2                     | 3                     | 4                     | 5                     | 6                     | 7                     |                |
| not at all exposed | <input type="radio"/> | <input type="radio"/> | <input type="radio"/> | <input type="radio"/> | <input type="radio"/> | <input type="radio"/> | <input type="radio"/> | highly exposed |

15. The child is in the playground and sees his mother smoking but does not smell smoke

|                    |                       |                       |                       |                       |                       |                       |                       |                |
|--------------------|-----------------------|-----------------------|-----------------------|-----------------------|-----------------------|-----------------------|-----------------------|----------------|
|                    | 1                     | 2                     | 3                     | 4                     | 5                     | 6                     | 7                     |                |
| not at all exposed | <input type="radio"/> | <input type="radio"/> | <input type="radio"/> | <input type="radio"/> | <input type="radio"/> | <input type="radio"/> | <input type="radio"/> | highly exposed |

16. The child is in the playground and smells cigarette smoke but does not see the smoker

|                    |                       |                       |                       |                       |                       |                       |                       |                |
|--------------------|-----------------------|-----------------------|-----------------------|-----------------------|-----------------------|-----------------------|-----------------------|----------------|
|                    | 1                     | 2                     | 3                     | 4                     | 5                     | 6                     | 7                     |                |
| not at all exposed | <input type="radio"/> | <input type="radio"/> | <input type="radio"/> | <input type="radio"/> | <input type="radio"/> | <input type="radio"/> | <input type="radio"/> | highly exposed |

17. The child is in the playground and sees his mother smoking and can smell the smoke

1 2 3 4 5 6 7

not at all exposed        highly exposed

C. Next you will be presented with the same pictures, this time you will be asked to rate the health risk to the child in the described or pictured situation:

1 2 3 4 5 6 7

no risk        high risk

18.

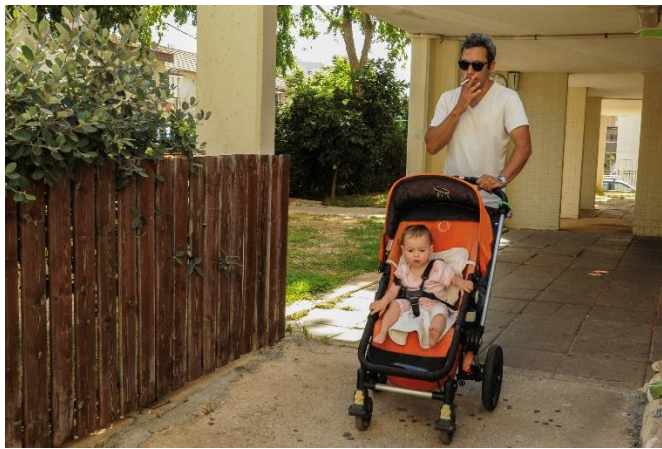

1 2 3 4 5 6 7

no risk        high risk

19.

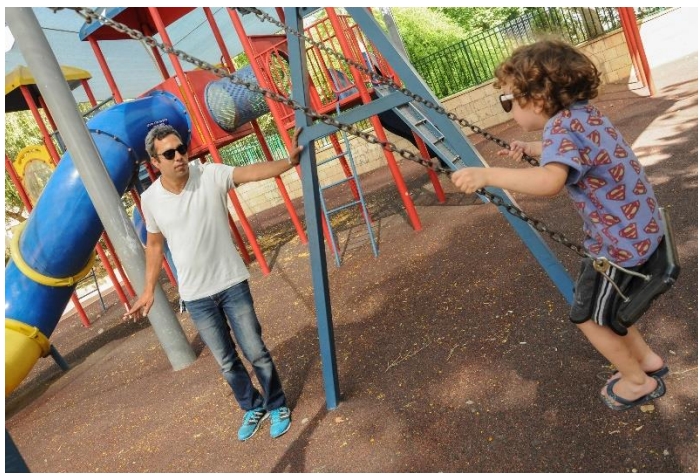

1 2 3 4 5 6 7

no risk        high risk

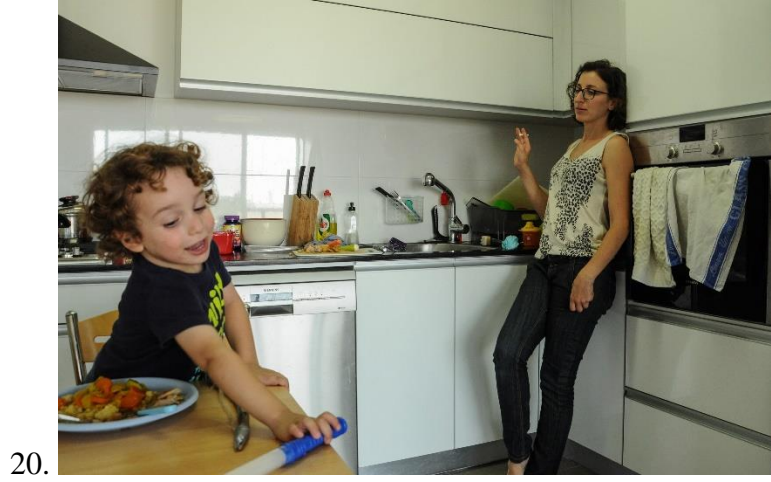

1 2 3 4 5 6 7

no risk        high risk

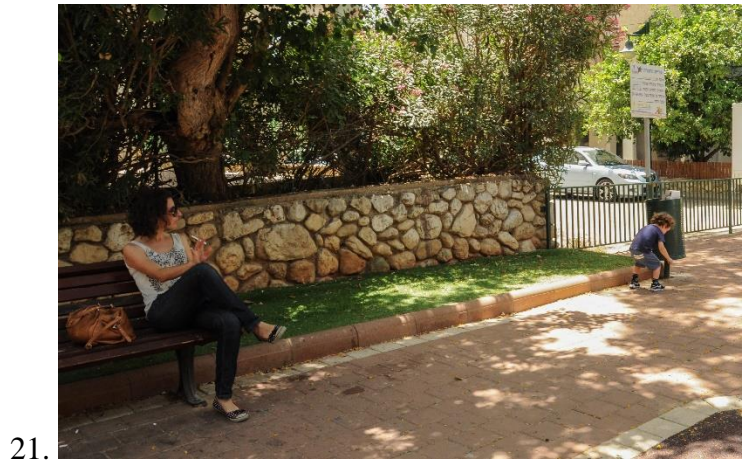



1 2 3 4 5 6 7

no risk

high risk

22.

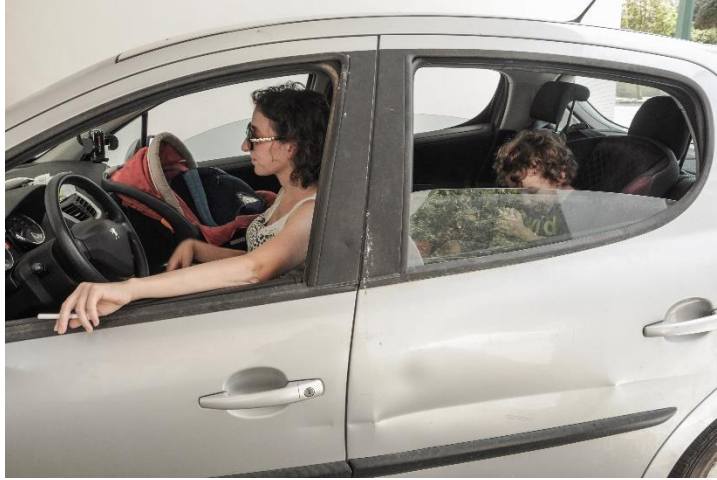

1 2 3 4 5 6 7

no risk

high risk

23.

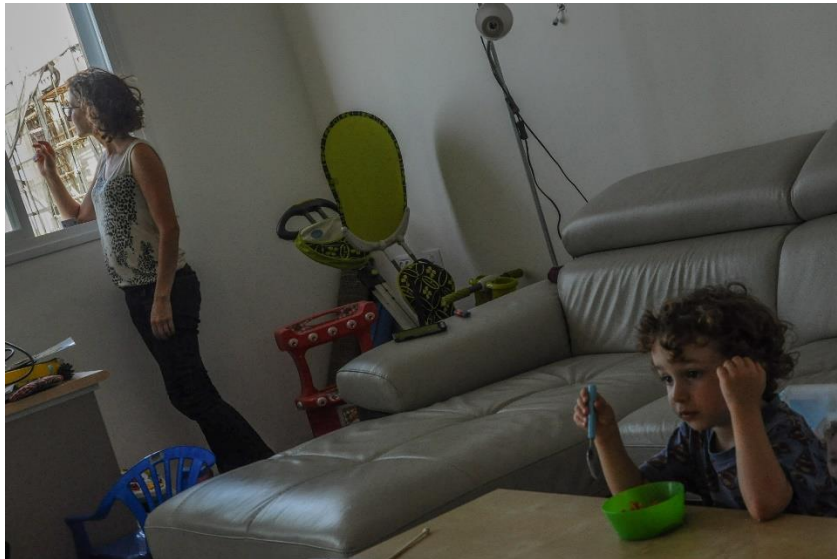

1 2 3 4 5 6 7

no risk

high risk

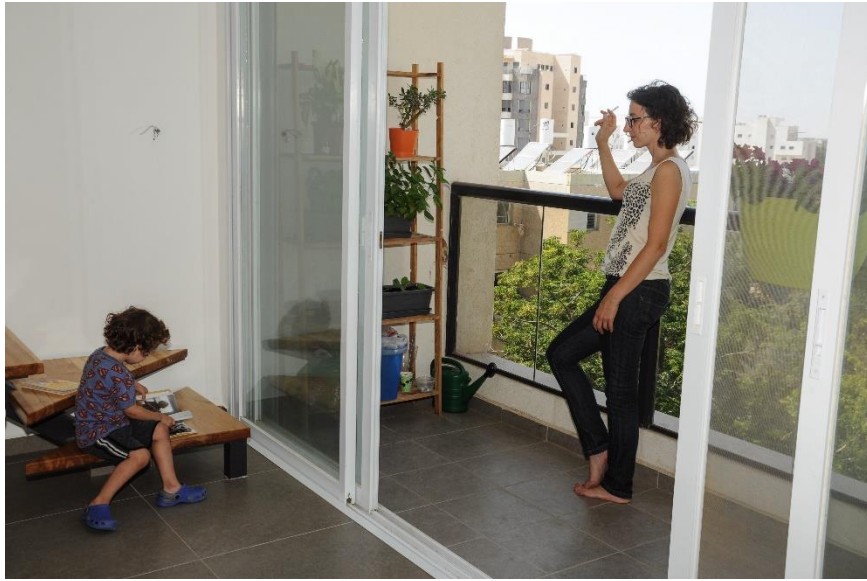

24.

1 2 3 4 5 6 7

no risk

high risk

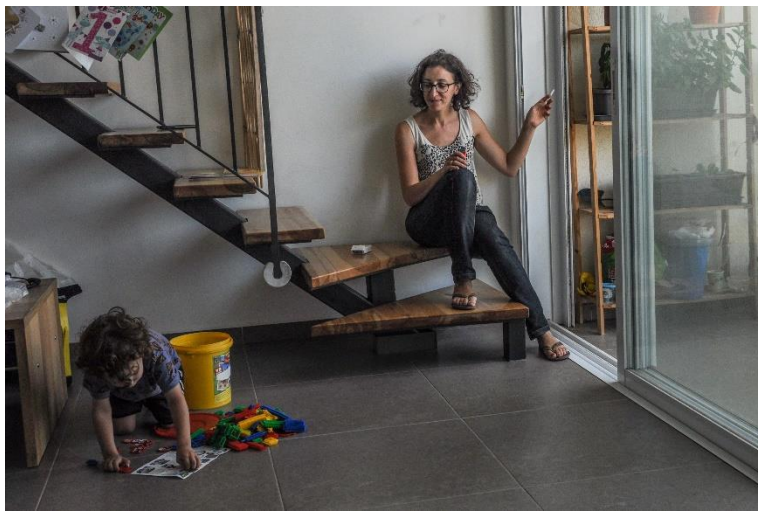

25.

1 2 3 4 5 6 7

no risk

high risk

26. The child is in the kitchen, someone is smoking on the adjacent service balcony

1 2 3 4 5 6 7

no risk

high risk

27. The child is in a room where someone smoked 12 hours ago

1 2 3 4 5 6 7

no risk        high risk

28. The child is in a room where someone smoked 2 hours ago

1 2 3 4 5 6 7

no risk        high risk

29. The child is in a room where someone smoked 30 minutes ago

1 2 3 4 5 6 7

no risk        high risk

30. The child is in a car where someone smoked 1 hour ago

1 2 3 4 5 6 7

no risk        high risk

31. The child is in a car where someone smoked 20 minutes ago

1 2 3 4 5 6 7

no risk        high risk

32. The child is in the playground and sees his mother smoking but does not smell smoke

1 2 3 4 5 6 7

no risk        high risk

33. The child is in the playground and smells cigarette smoke but does not see the smoker



40. How confident did you feel of your answers?

|            |                       |                       |                       |                       |                       |                       |                       |           |
|------------|-----------------------|-----------------------|-----------------------|-----------------------|-----------------------|-----------------------|-----------------------|-----------|
|            | 1                     | 2                     | 3                     | 4                     | 5                     | 6                     | 7                     |           |
| not at all | <input type="radio"/> | <input type="radio"/> | <input type="radio"/> | <input type="radio"/> | <input type="radio"/> | <input type="radio"/> | <input type="radio"/> | very much |

41. Did you find it difficult to answer the questionnaire?

|            |                       |                       |                       |                       |                       |                       |                       |           |
|------------|-----------------------|-----------------------|-----------------------|-----------------------|-----------------------|-----------------------|-----------------------|-----------|
|            | 1                     | 2                     | 3                     | 4                     | 5                     | 6                     | 7                     |           |
| not at all | <input type="radio"/> | <input type="radio"/> | <input type="radio"/> | <input type="radio"/> | <input type="radio"/> | <input type="radio"/> | <input type="radio"/> | very much |

**Thank you for your participation!**
